# Supplementary material for: Targeting synthetic lethality between the SRC kinase and the EPHB6 receptor may benefit cancer treatment
Source: PubMed Central journal article supplement (PMC5226566; doi:10.18632/oncotarget.10569), 2016-07-13
Supplement: oncotarget-07-50027-s001.pdf [file oncotarget-07-50027-s001.pdf]

# Targeting synthetic lethality between the SRC kinase and the EPHB6 receptor may benefit cancer treatment

## Supplementary Materials

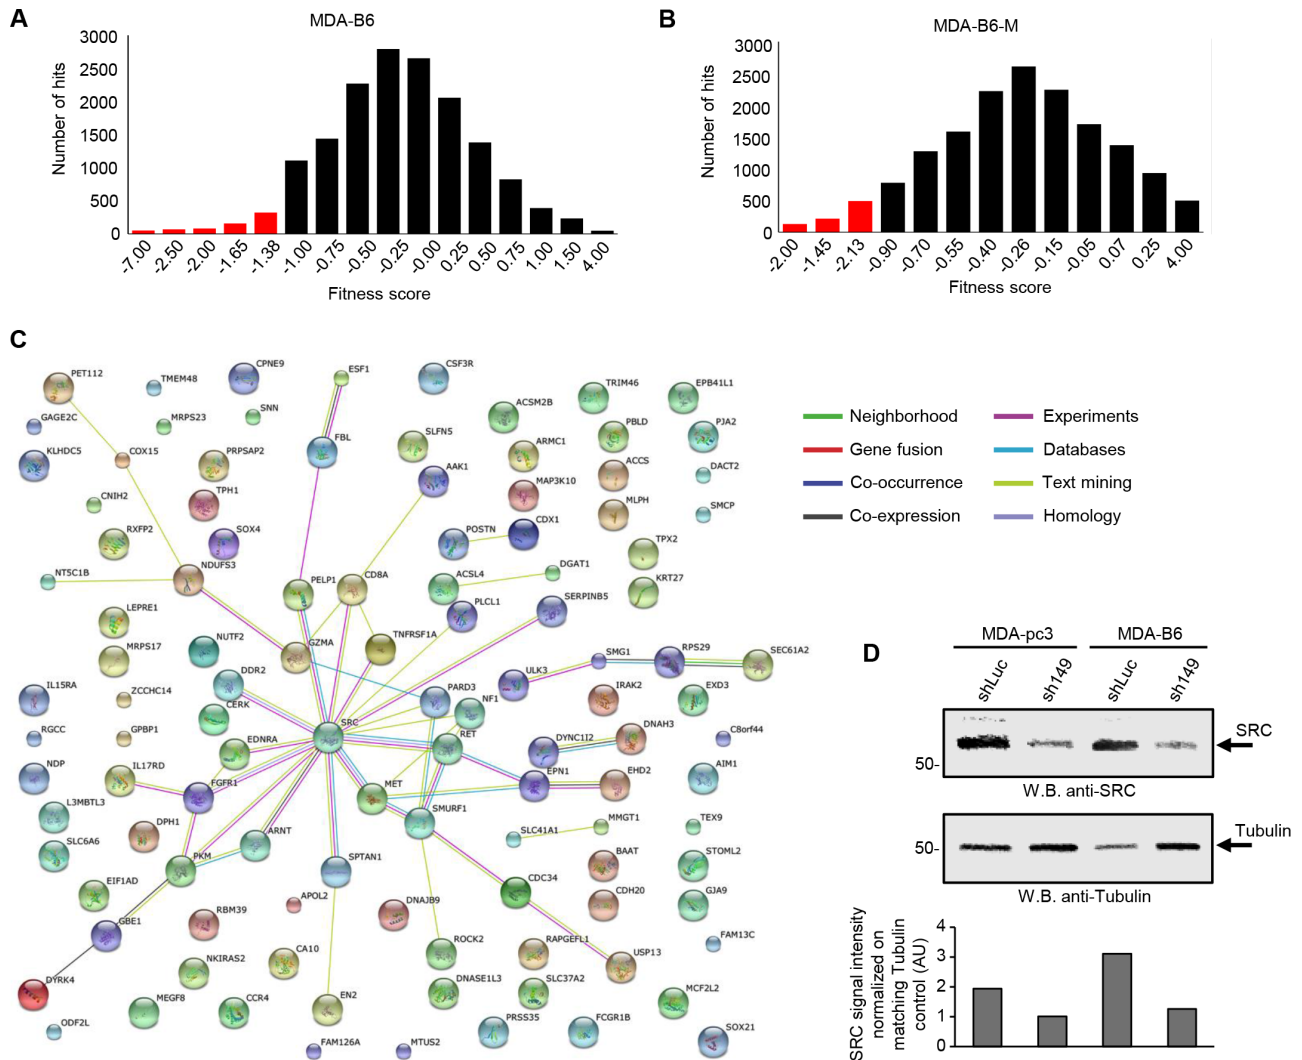

**Supplementary Figure S1: Characterization of SL interactions of EPHB6.** (A) Frequency chart of MDA-B6 DCC scores with *P*-values below 0.05 highlighted in red. (B) Frequency chart of MDA-B6-M DCC scores with *P*-values below 0.05 highlighted in red. (C) Network generated from the STRING database based on the function interactions of the genes. (D) SRC expression in MDA-pc3 and MDA-B6 cells transduced with SRC-targeting shRNA, or non-silencing shLuciferase (shLuc). SRC expression was analyzed by Western blotting with anti-SRC and quantitated by densitometry. SRC quantifications were normalized on matching tubulin controls and presented in arbitrary units (AU).

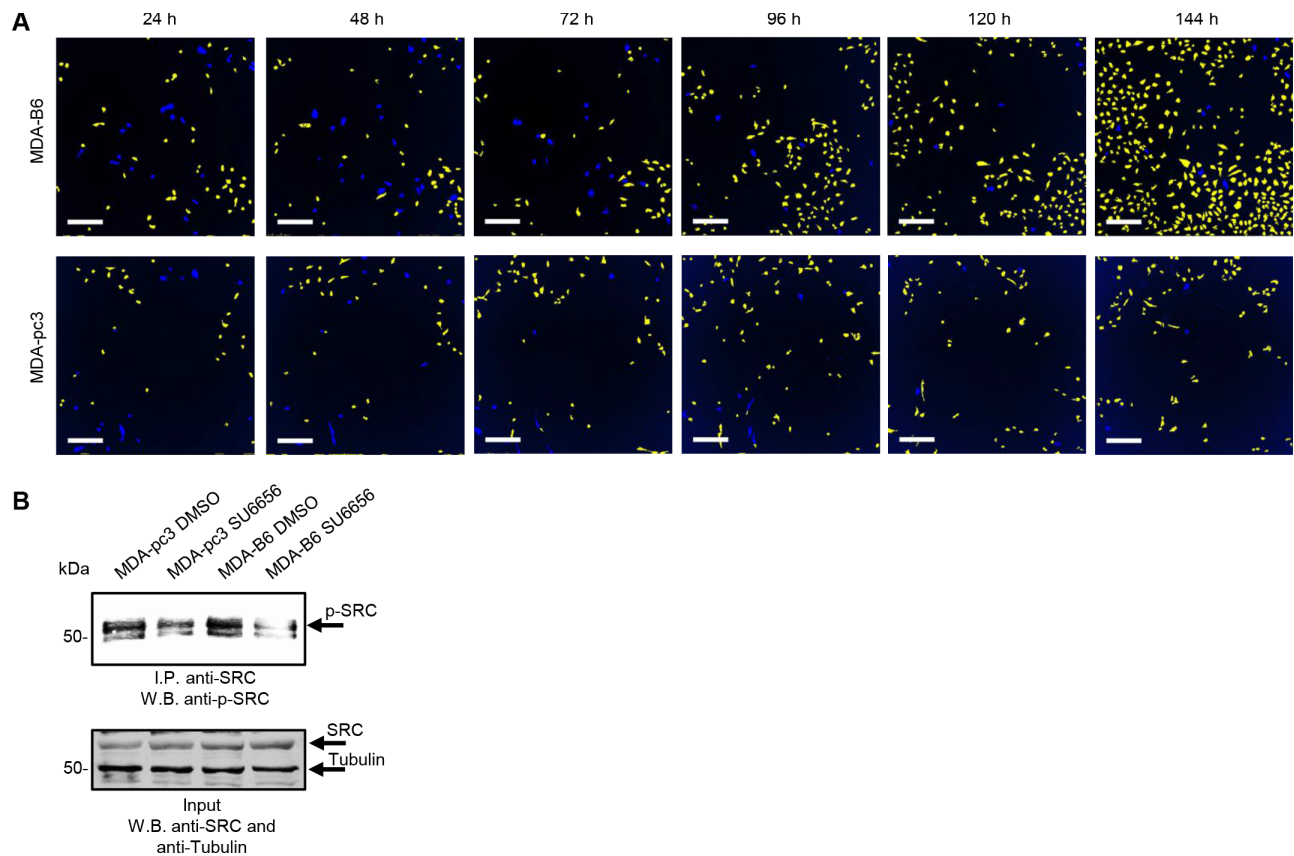

**Supplementary Figure S2: Analysis of EPHB6-SRC SL interaction.** (A) MDA-pc3 and MDA-B6 cells were stably transduced with a *src*-targeting sgRNA construct that also encoded the blue fluorescent protein (BFP) and selected in the presence of 2  $\mu$ g/ml of puromycin. The selected cells were transiently transfected with Cas9-GFP in 96-well plates. Green and blue fluorescence was quantified using the ImageXpress Micro XLS widefield automated fluorescence microscope and the MetaXpress version 6 software. The figure shows representative images of MDA-pc3 and MDA-B6 cells at consistent locations over the period of six days following Cas9 transfection. Yellow-highlighted cells represent those expressing BFP, while blue-highlighted cells represent those co-expressing BFP and GFP, according to the standard MetaXpress software settings. Scale bar, 250  $\mu$ m. (B) MDA-pc3 and MDA-B6 cells were serum-starved for 24 hours and then treated with 20  $\mu$ M SU6656 or matching DMSO control for 40 minutes in the presence of 10% FBS. Cells were lysed and immunoprecipitations were performed with anti-SRC. Immunoprecipitates were resolved by SDS-PAGE, transferred to the nitrocellulose membrane and Western blotted with anti-phospho-SRC (anti-p-SRC), recognizing SRC molecules phosphorylated on the activating tyrosine residue. The presence of SRC in matching cell lysates was monitored by Western blotting with anti-SRC.

**Supplementary Table S1: List of SL hits from the EphB6 screen****List of EPHB6 synthetic lethal interactions**

| Gene ID | Gene Symbol | Gene ID | Gene Symbol | Gene ID | Gene Symbol |
|---------|-------------|---------|-------------|---------|-------------|
| 22848   | AAK1        | 2091    | FBL         | 9584    | RBM39       |
| 84680   | ACCS        | 2210    | FCGR1B      | 5979    | RET         |
| 2182    | ACSL4       | 2260    | FGFR1       | 9475    | ROCK2       |
| 348158  | ACSM2B      | 2574    | GAGE2C      | 6235    | RPS29       |
| 202     | AIM1        | 2632    | GBE1        | 122042  | RXFP2       |
| 23780   | APOL2       | 81025   | GJA9        | 55176   | SEC61A2     |
| 55156   | ARMC1       | 65056   | GPBP1       | 5268    | SERPINB5    |
| 405     | ARNT        | 3001    | GZMA        | 219855  | SLC37A2     |
| 570     | BAAT        | 3601    | IL15RA      | 254428  | SLC41A1     |
| 28984   | C13orf15    | 54756   | IL17RD      | 6533    | SLC6A6      |
| 56260   | C8orf44     | 3656    | IRAK2       | 162394  | SLFN5       |
| 56934   | CA10        | 23281   | KIAA0774    | 4184    | SMCP        |
| 1233    | CCR4        | 57542   | KLHDC5      | 23049   | SMG1        |
| 925     | CD8A        | 342574  | KRT27       | 57154   | SMURF1      |
| 997     | CDC34       | 84456   | L3MBTL3     | 8303    | SNN         |
| 28316   | CDH20       | 64175   | LEPRE1      | 11166   | SOX21       |
| 1044    | CDX1        | 4294    | MAP3K10     | 6659    | SOX4        |
| 64781   | CERK        | 23101   | MCF2L2      | 6709    | SPTAN1      |
| 254263  | CNIH2       | 1954    | MEGF8       | 6714    | SRC         |
| 1355    | COX15       | 4233    | MET         | 30968   | STOML2      |
| 1348    | COX7AP2     | 79083   | MLPH        | 374618  | TEX9        |
| 151835  | CPNE9       | 93380   | MMGT1       | 55706   | TMEM48      |
| 1441    | CSF3R       | 51373   | MRPS17      | 7132    | TNFRSF1A    |
| 168002  | DACT2       | 51649   | MRPS23      | 7166    | TPH1        |
| 4921    | DDR2        | 4693    | NDP         | 22974   | TPX2        |
| 8694    | DGAT1       | 4722    | NDUFS3      | 80128   | TRIM46      |
| 55567   | DNAH3       | 4763    | NF1         | 25989   | ULK3        |
| 4189    | DNAJB9      | 28511   | NKIRAS2     | 8975    | USP13       |
| 1776    | DNASE1L3    | 93034   | NT5C1B      | 23174   | ZCCHC14     |
| 1801    | DPH1        | 10204   | NUTF2       |         |             |
| 1781    | DYNC1I2     | 57489   | ODF2L       |         |             |
| 8798    | DYRK4       | 56288   | PARD3       |         |             |
| 1909    | EDNRA       | 64081   | PBLD        |         |             |
| 30846   | EHD2        | 27043   | PELP1       |         |             |
| 84285   | EIF1AD      | 5188    | PET112L     |         |             |
| 2020    | EN2         | 9867    | PJA2        |         |             |
| 2036    | EPB41L1     | 5315    | PKM2        |         |             |
| 29924   | EPN1        | 5334    | PLCL1       |         |             |
| 51575   | ESF1        | 10631   | POSTN       |         |             |
| 54932   | EXD3        | 5636    | PRPSAP2     |         |             |
| 84668   | FAM126A     | 167681  | PRSS35      |         |             |
| 220965  | FAM13C      | 51195   | RAPGEFL1    |         |             |
